# Membranous Nephropathy in the UK Biobank

\*Patrick Hamilton<sup>1,2,3</sup>, \*Kieran Blaikie<sup>1,4</sup>, Stephen A. Roberts<sup>1,4</sup>, Matthew Gittins<sup>1,4</sup>, Mallory L. Downie<sup>5</sup>, Sanjana Gupta<sup>5</sup>, Catalin Voinescu<sup>5</sup>, Durga Kanigicherla<sup>1,3</sup>, Horia Stanescu<sup>5</sup>, Robert Kleta<sup>5</sup>, Paul Brenchley<sup>1,3</sup>

- 1 Manchester Academic Health Science Centre (MAHSC), The University of Manchester, 46 Grafton Street, Manchester, M13 9NT
- 2 Wellcome Centre for Cell-Matrix Research, Division of Cell Matrix Biology and Regenerative Medicine, School of Biological Sciences, Faculty of Biology Medicine and Health, The University of Manchester, Oxford Road, M13 9PL
- 3 Manchester Institute of Nephrology and Transplantation, Manchester Royal Infirmary, Oxford Road, Manchester, M13 9WL
- 4 Centre for Biostatistics, The University of Manchester, Oxford Road, M13 9PL
- 5 UCL Department of Renal Medicine, UCL Medical School, Rowland Hill Street, London, NW3 2PF

\*Joint first author

Corresponding Author

Dr Patrick Hamilton

[patrick.hamilton@manchester.ac.uk](mailto:patrick.hamilton@manchester.ac.uk)

## Abstract

Background: Despite MN being one of the most common causes of nephrotic syndrome worldwide, its biological and environmental determinants are poorly understood in large-part due to it being a rare disease. Making use of the UK Biobank, a unique resource holding a clinical dataset and stored DNA, serum and urine for ~500,000 participants, this study aims to address this gap in understanding.

Methods: The primary outcome was putative MN as defined by ICD-10 codes occurring in the UK Biobank. Univariate relative risk regression modelling was used to assess the associations between the incidence of MN and related phenotypes with sociodemographic, environmental exposures, and previously described increased-risk SNPs.

Results: 502,507 patients were included in the study of whom 100 were found to have a putative diagnosis of MN; 36 at baseline and 64 during the follow-up. Prevalence at baseline and last follow-up were 72 and 199 cases/million respectively. At baseline, as expected, the majority of those previously diagnosed with MN had proteinuria, and there was already evidence of proteinuria in patients diagnosed within the first 5 years of follow-up. The highest incidence rate for MN in patients was seen in those homozygous for the high-risk alleles (9.9/100,000 person-years).

Conclusion: It is feasible to putatively identify patients with MN in the UK Biobank and cases are still accumulating. This study shows the chronicity of disease with proteinuria present years before diagnosis. Genetics plays an important role in disease pathogenesis, with the at-risk group providing a potential population for recall.

## Keywords

Membranous Nephropathy; UK Biobank; Nephrotic Syndrome; Genetics

## Introduction

Membranous nephropathy (MN) is among the most common causes of adult nephrotic syndrome worldwide and has a significant healthcare burden, despite being a rare disease (10-12 cases per million)<sup>1</sup>. For the majority of patients, it is an autoimmune disease associated with the anti-phospholipase M-type receptor autoantibody (anti-PLA<sub>2</sub>R); a highly sensitive biomarker and seemingly pathogenic factor in its own right<sup>2,3</sup>. There appears to be a strong genetic contribution to the condition, with the possession of single-nucleotide polymorphisms (SNPs) at *PLA2R1* and the Major Histocompatibility Complex, Class II, DQA1 (*HLA-DQA1*) conferring a dramatically increased risk of developing the disease<sup>4-6</sup>. The most recent GWAS has also shown two further loci associated with disease risk in *NKFB1* and *IRF4*<sup>6</sup>. However, given its rarity, understanding not only the disease pathogenesis but also the risk of disease onset has been challenging. Why some patients with the genetic predisposition develop a pathogenic antibody whilst others do not, has still not been elicited. Circumstantial evidence suggests there may be a role for the loss of tolerance. As with other autoimmune conditions, the presence of the disease associated risk SNPs are unlikely to be solely responsible for the evolution of the disease. An accompanying trigger, be it environmental or pathogenic, at the correct time, is needed to initiate the immune cascade leading to symptoms. The podocyte antigen peptide sequence shows similarities to a cell wall enzyme in certain commonly encountered pathogens such as *Clostridia* species<sup>7</sup>. One study from China suggests a potential environmental trigger by identifying an association between air pollution and MN compared to other autoimmune glomerulopathies<sup>8,9</sup>.

The UK Biobank holds a clinical dataset and stored deoxyribonucleic acid (DNA), serum and urine for over 500,000 participants, aged between 40-70 years old, recruited from across the United Kingdom from 2007-2010. This age profile corresponds to the age of onset of MN with a mean of 54 years. DNA has been genotyped on a genome-wide microarray with subsequent imputation.

Further health record data has been linked through the Hospital Episode Statistics (HES) and cancer and mortality statistics<sup>10</sup>. Participant place of birth, residential area and occupation are all recorded, providing an invaluable resource for the study of environmental and occupational pollution exposures<sup>11-14</sup>. With the deep phenotyping of each participant, life-long follow-up, genotyping and health record linkage, the UK Biobank provides a unique and powerful tool to help understand the epidemiology of rare diseases such as MN. An initial

step in the use of the UK Biobank is its validation as a tool for accurately identifying patients with MN. Neither International Classification of Disease tenth edition (ICD-10) nor UK Read codes (a coding system for clinical terms used in the UK) have an explicit code for MN, but both coding systems have codes that will include MN plus potentially several other diagnoses.

Here, for the first time, we have used the UK Biobank to demonstrate its feasibility and to investigate the genesis of the rare kidney disease, MN.

The specific study aims were:

- a) to provide a detailed description of the numbers of participants with confirmed or possible MN within the UK Biobank to inform the identification of participants for further phenotyping and sampling or recall for assessments
- b) to determine the prevalence and incidence rates of MN in this population
- c) to stratify the UK Biobank population by the genetic risk of MN
- d) to assess the feasibility of linking environmental factors (infection and occupational exposure) to triggering of autoimmunity in this genetically susceptible cohort

## Methods

This is a cohort study in which the primary outcome was putative Membranous nephropathy (MN), defined as any primary or secondary HES inpatient diagnosis of ICD-10 N02.2, N03.2, N04.2, or N05.2 occurring before the UK Biobank HES data refresh in March 2019. The nominal diagnosis date was taken as the earliest such record. This did not include self-reported diagnoses at the time of UK Biobank entry, or clinical diagnoses not resulting in hospital admission, which are not fully available in the Biobank dataset.

Primary care attendance data in the UK is provided by multiple separate entities, with which UK Biobank is working to allow for data linkage. At present, a subset of 228,957 UK Biobank participants had clinical attendances in primary care<sup>11–13</sup>. For these records putative MN was defined as the equivalent Read codes version 2 (READ2) K0A22, K0A32, K021., K011, K016., K031. or READ3 codes K0A22, K021., K011., K016., K031.

Our descriptive study examined multiple exposures including sociodemographic characteristics and medical history records recorded at the time of UK Biobank entry, as well as hospital inpatient ICD-10 diagnoses and the Office of Population Censuses and Surveys Classification of Interventions and Procedures version 4 (OPCS-4) operative procedures occurring prior to the UK Biobank data as of 10<sup>th</sup> December 2019. Additional exposures examined included algorithmically derived end-stage renal disease (ESRD), measures of area-level residential air pollution, and Standard Occupational Classification (SOC)-2000 occupation-linked workplace airborne exposures as derived from the SOC codes and the Airborne Chemical Job Exposure Matrix (ACE JEM)<sup>15</sup>. Both CKD and Renal disease derived from Biobank fields f.41202 and f.41204. In addition to this, CKD defined using the ICD 10 code N18 – chronic kidney disease. Renal Disease was defined using the ICD codes N0\* and N1\* which includes renal disease but not limited to CKD. The source of each variable is provided in supplementary Table S1.

Given coeliac disease and type 1 diabetes mellitus classically share the same HLA class II alleles as primary MN, namely HLA-DQ2.5<sup>29–31</sup>, we investigated the incidence of these conditions in the UK biobank in relation to identified MN cases.

Residential linked air pollution estimates of particulate matter air pollutants with aerodynamic diameters <10µm (PM10) and <2.5µm (PM2.5 or fine PM), and gaseous air pollutions (Nitrogen Dioxide (NO<sub>2</sub>) and Nitrogen Oxide (NO)) were generated for 2010 using Land Use Regression (LUR) modelling as part of the European Study of

Cohorts and Air Pollution Effects (ESCAPE, <http://www.escapeproject.eu/>). Additional estimates for Nitrogen Dioxide were estimated for the years 2005-2007 from EU-wide air pollution maps (resolution 100 metre x 100 metre) based in the LUR models, full details of the model and its performance can be found online<sup>16</sup>. All effect estimates related to associations with annual estimates of each air pollution were expressed per  $\mu\text{g m}^{-3}$ .

Where descriptive statistics have been produced, the median and interquartile range (IQR) have been reported for continuous measures and the proportion and percentages per category have been reported for categorical variables. Where data is missing, the number of cases with missing data is reported. In reporting disease incidence, the number of incident cases occurring post-UK Biobank entry has been divided by the total person-years of follow-up across the disease-free UK Biobank population until March 1<sup>st</sup> 2019, accounting for individual date of UK Biobank entry and recorded date of death if applicable. Baseline patients defined as those with a diagnosis of MN on study entry, 'Early Incident' defined as those diagnosed within five years after study entry, and 'Late Incident' defined as those patients diagnosed later than 5 years after study entry.

SNPs associated with MN were identified as the lead independent SNPs from 3 previous GWAS studies, referred to as GWAS1-3. Allele counts identified in GWAS1<sup>4</sup> were obtained from the directly genotyped Biobank dataset. Allele counts from GWAS2<sup>5</sup> and GWAS3<sup>6</sup> were obtained from the imputed Biobank dataset. Imputed genotypes were used as called regardless of any quality assessment.

Associations between dichotomous phenotypes and genotypes were assessed by determining the relative risk (RR) associated with each genotype compared to homozygous reference alleles, and the RR per allele (additive genetic model).

To determine univariate association between exposures of interest and MN diagnosis, generalised linear models were used with non-cases as the reference category. Results were presented as relative risk ratios (RR) with accompanying 95% Wald confidence intervals.

All statistical analyses were performed in R Version 3.5.1<sup>17</sup>. Plink v2.00 and BCFtools v1.10.2 were used to extract genetic data from the UK Biobank<sup>18-21</sup>.

## Results

### MN Incidence and Prevalence

A total of 502,507 patients were included in the study. Based on hospital admissions, 100 participants were found to have a putative diagnosis of MN as indicated by the ICD 10 codes, 36 at baseline and 64 occurring during the follow-up period. At baseline, the prevalence of MN in the Biobank population was 72 cases per million, with 199 cases per million at the latest follow up. There was a total of 64 incident cases, with N052 contributing the largest number of patients at 31. With approximately 4.98 million total person-years of follow-up across the UK Biobank population, this corresponded to an incidence rate of 1.29 per 100,000 person-years, with a continued rise over time as the Biobank population ages. Table 1 and figure 1.

### Demographics of MN cases

In the MN cohort, the median age at baseline assessment was 62 years old (IQR 56 – 65), compared to a median of 58 (IQR 50-63) in the non-MN group. There were 39% males in the MN cohort, compared to 54.4% males in the non-MN cohort. The majority of participants in the UK Biobank with and without MN were white, with similar BMI, smoking status, alcohol consumption and levels of deprivation as measured by the Townsend Deprivation Index and by the Index of Multiple Deprivation. Table 2.

### Clinical

There was a higher level of proteinuria at baseline in the MN group compared to the non-MN group, with a median urinary albumin:creatinine ratio (uACR) of 3.0 mg/g (IQR 0.4-22.9) and 0.4 mg/g (IQR 0.4-0.6) respectively. Renal function at baseline was also lower in the MN group with a median estimated glomerular filtration rate (eGFR) 78.1ml/min/1.73m<sup>2</sup> (IQR 52.2-93.6), compared to the non-MN cohort who had a median eGFR 92.8ml/min/1.73m<sup>2</sup> (IQR 82.9-100.1). Table 3.

For those diagnosed with MN prior to study recruitment, a majority (66%; n=21) had proteinuria at baseline with a uACR of more than 3mg/g. 28% (n=9) had macro-albuminaemia with a uACR of more than 30mg/g. For those

diagnosed within 5 years of recruitment (early incident), there was already evidence of proteinuria at baseline, with 49% (n=17) having a uACR of more than 3mg/g, and 29% (n=10) with a uACR of more than 30mg/g. In the late incident group, diagnosed more than 5 years after recruitment, the majority had no evidence of proteinuria at baseline with 69% (n=18) having a uACR of less than 3mg/g. For this late incident group there was proteinuria noted at baseline in 31% (n=8) of patients (uACR greater than 3mg/g), and macro-albuminaemia in 15% (n=4) with a uACR of more than 30mg/g. Table 3.

Renal function for patients diagnosed prior to recruitment and in the early incident group, as measured by eGFR, was similar at baseline; median 74.3ml/min/1.73m<sup>2</sup> (IQR 46.8-86.7) in the baseline group, and median 76.8ml/min/1.73m<sup>2</sup> (IQR 48.8-93.8) in the early incident group. In the late incident group, the median baseline eGFR was 92.9ml/min/1.73m<sup>2</sup> (IQR 76.3-95.0). Table 3.

## Genetics

In the total population, we found that 73.4% (n=357,516) were homozygous for the low-risk *HLA-DQA1* alleles (CC) and 2.4% (n=11,622) patients were homozygous for the high-risk allele (TT). For *PLA2R1*, 35.8% (n=174,588) were homozygous for the high-risk alleles (AA) compared to 16.8% (n=81,861) homozygous for the low-risk GG alleles. Of these, 0.8% (n=4079) were found to have both high-risk allele SNPs. Tables S2 and S3.

We see similar results in the UK Biobank population as in the original GWAS with respect to risk of MN diagnosis. Compared to those homozygous for the low-risk *HLADQ* allele (C), being homozygous for the high-risk allele (T) was associated with an 8.79 times greater risk of MN diagnosis (RR: 9.79, 95% CI: 5.36-17.85). For *PLA2R1*, compared to those homozygous for the low-risk allele (G), being homozygous for the high-risk allele (A) was associated with a 1.22 times greater risk of MN (RR: 2.22, 95% CI: 1.16-4.25). Considering *HLADQ* and *PLA2R1* in combination, using the low-risk allele combination CCGG as the reference, the relative risk of MN for those homozygous for both SNPs was 23.44 (95% CI: 7.67-71.62). There was no increased risk of MN associated with being homozygous for either of the two novel lead SNPs identified in the most recent GWAS<sup>6</sup>. For *NFKB1*, the relative risk of MN among those homozygous for the high-risk allele was 1.08 (95% CI: 0.56-2.10); and for *IRF4*, the RR among those homozygous for the high-risk allele was 1.72 (95% CI: 0.62-4.75). Table 4 and Figure 2.



The highest incidence rate of MN was seen in those homozygous for the high-risk *HLA-DQA1* allele (TT) and high-risk *PLA2R1* allele (AA), with an incidence rate of 9.9 cases per 100,000 person-years. The lowest-risk group (CCGG) had an incidence rate of 0.5 cases per 100,000 person-years. Table 5.

Subgroup analysis comparing the cohorts homozygous for both the high-risk alleles for *HLA-DQA1* and *PLA2R1* (TT and AA respectively) with those not homozygous for both show a similar proportion of diabetes, both self-reported and through HES linkage. In the high-risk group, 2.8% of individuals self-reported having coeliac disease, and 3.2% were identified as having coeliac disease through HES linkage, this is compared to 0.4% and 0.5% respectively, in the low-risk group. Table S4.

At baseline, there was no difference in eGFR in patients homozygous for the high-risk *HLA-DQA1* and *PLA2R1* alleles (TTAA) compared to those not. For uACR, the high-risk group showed weak association with a higher degree of proteinuria over 30 mg/g; 0.71% among those homozygous for TTAA, compared to 0.47% in those not homozygous for the high-risk alleles (not TTAA). Table S4.

Using patients with baseline proteinuria data, and homozygous for the low-risk allele for *HLA-DQA1* as reference, there was a weak negative association with mild or macro-albuminaemia for those homozygous for the high-risk alleles (TT); (RR: 0.94, 95% CI: 0.86-1.02). Patients homozygous for the high-risk *PLA2R1* allele (AA) were slightly more likely to have mild proteinuria (RR: 1.05, 95% CI: 1.01-1.08) and heavy proteinuria (RR: 1.11, 95% CI: 0.99-1.26), compared to the low-risk allele group (CC). Table S5.

## Pollution and Work-Related Environmental Exposures

Univariate comparisons indicated no significant associations between increased environmental exposure to Nitrogen Dioxide, Nitrogen Oxides, or Particulate Matter and risk of MN diagnosis. Likewise, no significant associations were found between work-related environmental exposures and risk of MN diagnosis, though comparisons were subject to small sample sizes among those exposed with MN. Tables 6 and S6.

## 219 Primary care data

220 Data from primary care records was available for a subset of 228,957 (45.6%) participants. Of these, there were  
 221 38 patients identified as putative MN cases using the previously defined READ codes. Using hospital admissions  
 222 data, 41 patients in this subset were identified as having MN using the previously defined ICD codes. Of all  
 223 identified patients with MN, 19 were identified in both sources, 19 only in primary care and 22 only through  
 224 hospital admissions. For those patients identified in both sources, the majority were coded in both databases at  
 225 the same time, but there were a number of patients with diagnoses in the primary care database for whom  
 226 diagnosis was coded years in advance of hospital admission. The age distribution at first hospital admission was  
 227 similar among patients included and not included in the primary care database. However, some of the primary  
 228 care cases not identified by hospital admissions were diagnosed at a younger age. Supplementary figure S7.

## Discussion

This is the first study to examine the occurrence and determinants of MN within the UK Biobank cohort. We have shown that putative MN cases can be identified at entry to the UK Biobank study as well as throughout follow-up. The incidence rate calculated here of 1.29 diagnoses per 100,000 person-years is similar to previously reported rates in other studies<sup>1,8,9,22–24</sup>. Most previous studies reporting incidence rates for MN are based on retrospective data from biopsies – a possibly unrepresentative cohort given the inherent suspicion of an underlying kidney disease. In contrast, the UK Biobank cohort is ostensibly a population-based sample (see Fry *et al* for consideration of the sample representativeness<sup>14</sup>), with this study being the first to evaluate MN occurrence in such a population.

At present MN remains a biopsy-diagnosed condition requiring specialist input, usually in a tertiary referral centre in the UK. The coding for MN in primary care records is therefore generally based on correspondence from a tertiary care centre, meaning patients assigned codes for MN are highly likely to have the condition (unpublished work). However, there is no unifying code for MN in either ICD-10 or READ codes, and those that are available include adjunctive diagnoses. This raises the possibility that patients with MN could be missed, as they have been coded with more generic descriptions of the condition such as nephrotic syndrome. A number of patients identified from primary care data were diagnosed prior to the initiation of HES and who do not, therefore, appear in the hospital admissions database at all, or who appear years later. It may be that some of these patients were already in remission before the commencement of HES data, and therefore were never captured. At present, the available HES data also does not capture outpatient episodes, meaning patients already diagnosed prior to the commencement of the database, will not be identified as they are only seen in the outpatient clinic setting and not as an inpatient. Patients in remission could appear in the HES database years after identification in the General Practitioner (GP) database, owing to a relapse necessitating admission to a specialist nephrology centre. An ongoing limitation with data linkage in the UK Biobank is the incomplete coverage of both primary care data and HES, although this is being continuously addressed and updated.

MN is a disease of middle to late age, with the median age at baseline here of 62 years old<sup>25,26</sup>. We found a female predominance for MN in the UK Biobank, which is in-keeping with autoimmune disease in general although not specifically in MN<sup>27</sup>. A number of studies in the past have shown the opposite is true with MN,

however, though this prior work has been inconsistent, emblematic of the difficulty of epidemiological studies in examining this rare disease<sup>1</sup>.

As expected, there was a higher degree of proteinuria and lower eGFR at baseline in our study in patients with MN compared to the non-MN cohort. Interestingly, those patients who had no diagnosis of MN at baseline but who went on to be diagnosed within 5 years already had evidence of subclinical biochemical abnormalities suggestive of MN. Almost half of these early incident patients had some degree of proteinuria and over a third had an eGFR of less than 60ml/min/1.73m<sup>2</sup>. These findings are similar to other recent studies<sup>28</sup>, and are indicative of the chronicity and slowly progressive nature of the disease, with patients experiencing ongoing pathogenic autoantibody production and glomerular damage years before it becomes clinically apparent. Identification of this prodromal cohort in the UK Biobank offers a unique opportunity to confirm the early role of anti-PLA<sub>2</sub>R in pathogenesis up to 5 years prior to clinical diagnosis of MN using the sera stored at study entry. It also allows testing of the hypothesis that infection could be the environmental trigger for MN by interrogation of the IgG antibody proteome library in early serum samples first positive for anti-PLA<sub>2</sub>R, in comparison to age/gender-matched controls. It may be possible to identify a unique IgG phenotype to infectious agents coincident with the onset of anti-PLA<sub>2</sub>R autoantibodies.

Currently 80% of autoimmune MN patients present with nephrotic syndrome without any prior indication of an underlying kidney disease, but with proteinuria and autoantibody production that may have been active for a variable period before this. Although the exact cause is still unknown, knowledge of the disease pathogenesis has increased markedly since the discovery of the anti-PLA<sub>2</sub>R autoantibody. There is undoubtedly a strong genetic component to autoimmune MN, with multiple GWAS initially identifying two genes, *HLA-DQA1* and *PLA2R1* in Europeans, and more recently *NFKB1* and *IRF4*, that all account for susceptibility to MN. Possession of homozygous pathological alleles of *HLA-DQA1* and *PLA2R1* raises the odds ratio from 1 to 78 for having the disease<sup>4</sup>. What is not known, is how likely it is for a patient to develop MN in the presence of these high-risk alleles. What is the lifetime risk of developing MN conferred by the high-risk alleles? Certainly, in our study, the relative risk of MN is significantly higher in patients homozygous for the *HLA-DQA1* and *PLA2R1* compared to those without any of the risk alleles (RR: 23.4, 95% CI: 7.7-71.6). Homozygosity of risk alleles in *HLA-DQA1* and *PLA2R1* resulted in a higher incidence of MN (9.9 cases per 100,000 person-years) and a higher degree of macroalbuminaemia. This suggests not only a higher incidence but also a more severe phenotype in keeping with

previous work showing an association of individuals with the *HLA-DQA1* risk alleles having higher anti-PLA2R antibodies<sup>26</sup>. There was a low penetrance with only 0.20% of patients homozygous for the high-risk alleles having, or developing MN, during the study follow-up, but as UK Biobank is a lifetime epidemiology study, the risk of developing MN will become evident. Given the chronicity of MN disease and its diagnosis late in life for most patients, this is a group of patients in whom active follow-up would be essential in order to determine the strength of genetics on the development of the disease.

We found no evidence for an increase in MN diagnosis in relation to particulate exposure or occupational exposures to heavy metals and hydrocarbons. This may be related to the much lower levels of exposure among patients in the UK compared to China, where this association was first described in biopsy patients<sup>8,9</sup>. In our cohort, the median level of exposure over the study period was 10.0  $\mu\text{g m}^{-3}$  for particulate matter of less than 2.5  $\mu\text{m}$ , compared to a mean of 55.6  $\mu\text{g m}^{-3}$  (range 8.1 to 110.5) in China. Limitations to this comparison include the small numbers of exposed cases, lack of data on previous exposures, and the study population being generally more educated and from a higher socioeconomic background compared to the general population, and therefore potentially less likely to be exposed to higher pollution levels – all influencing the statistical power of environmental comparisons and our ability to detect plausible magnitude associations. A significantly larger study population would be required to investigate this further at lower particulate matter levels, and at present would be outside the remit of the UK Biobank.

## Conclusion

Here we have shown for the first time that it is feasible to putatively identify patients with MN in the UK Biobank, both at study entry and over time, allowing for the use of this powerful resource to study initiation of a rare autoimmune disease in greater depth than previously possible, however definitive diagnosis would require participant or stored sample access. This study provides further evidence for the chronicity of disease with proteinuria present years prior to diagnosis in a number of patients. Genetics also plays an important role in the development of the disease although with low penetrance. Patients with the high-risk alleles provide an invaluable study population for prospective investigation of the disease process, this is particularly pertinent given the potential for missed cases in the database. This at-risk group would be an important sample for recall to interrogate further. Despite the low numbers of MN patients identified, this is the most comprehensive study of MN in a defined population to date. Importantly it also provides a baseline for further work to understand the pathogenesis of the disease as follow-up progresses.

318 Author Contributions

319 PB – project conception

320 PB, SR, DAK and PH – project protocol development

321 KB, SR and MG – data analysis

322 MLD, CV, HS, SG, SR - Genetic Analysis

323 PH – draft manuscript preparation

324 All authors – manuscript review

325

326

327 Acknowledgements

328 This was an approved study (I.D. 1618) by UK BioBank (<http://ukbiobank.org>). We acknowledge funding from

329 Kidney Research UK (KRUK) for the Stoneygate Foundation Grant JFS\_IN\_003\_20160914

330 MLD was supported by the KRESCENT post-doctoral fellowship from the Kidney Foundation of Canada

331

332

333 Disclosures

334 None

335

336

337

338

339

340

341

## References

1. McGrogan A, Franssen CFM, Vries CS de. The incidence of primary glomerulonephritis worldwide: a systematic review of the literature. *Nephrol Dial Transpl.* 2011;26(2):414-430. doi:10.1093/ndt/gfq665
2. Beck L, Bonegio R, Lambeau G, et al. M-Type Phospholipase A2 Receptor as Target Antigen in Idiopathic Membranous Nephropathy. *N Engl J Med.* 2009;361(1):11-21. doi:10.1056/nejmoa0810457
3. Logt AE van de, Fresquet M, Wetzels JF, Brenchley P. The anti-PLA2R antibody in membranous nephropathy: what we know and what remains a decade after its discovery. *Kidney Int.* 2020;96(6):1292-1302. doi:10.1016/j.kint.2019.07.014
4. Stanescu H, Arcos-Burgos M, Medlar A, et al. Risk HLA-DQA1 and PLA2R1 alleles in idiopathic membranous nephropathy. *N Engl J Med.* 2011;364(7):616-626. doi:10.1056/nejmoa1009742
5. Sekula P, Li Y, Stanescu HC, et al. Genetic risk variants for membranous nephropathy: extension of and association with other chronic kidney disease aetiologies. *Nephrol Dial Transpl.* 2017;32(2):325-332. doi:10.1093/ndt/gfw001
6. Xie J, Liu L, Mladkova N, et al. The genetic architecture of membranous nephropathy and its potential to improve non-invasive diagnosis. *Nat Commun.* 2020;11(1):1600. doi:10.1038/s41467-020-15383-w
7. Fresquet M, Jowitt TA, Gummadova J, et al. Identification of a Major Epitope Recognized by PLA2R Autoantibodies in Primary Membranous Nephropathy. *J Am Soc Nephrol.* 2014;26(2):302-313. doi:10.1681/asn.2014050502
8. Li J, Cui Z, Long J, et al. Primary glomerular nephropathy among hospitalized patients in a national database in China. *Nephrol Dial Transpl.* Published online 2018. doi:10.1093/ndt/gfy022
9. Xu X, Wang G, Chen N, et al. Long-Term Exposure to Air Pollution and Increased Risk of Membranous Nephropathy in China. *J Am Soc Nephrol.* 2016;27(12):3739-3746. doi:10.1681/asn.2016010093
10. (HSCIC) H and SCIC. Hospital Episode Statistics. Accessed January 15, 2021. <https://digital.nhs.uk/data-and-information/data-tools-and-services/data-services/hospital-episode-statistics#further-information>
11. Elliott P, Peakman TC, Biobank U. The UK Biobank sample handling and storage protocol for the collection, processing and archiving of human blood and urine. *Int J Epidemiol.* 2008;37(2):234-244. doi:10.1093/ije/dym276
12. Ollier W, Sprosen T, Peakman T. UK Biobank: from concept to reality. *Pharmacogenomics.* 2005;6(6):639-646. doi:10.2217/14622416.6.6.639
13. Sudlow C, Gallacher J, Allen N, et al. UK Biobank: An Open Access Resource for Identifying the Causes of a Wide Range of Complex Diseases of Middle and Old Age. *Plos Med.* 2015;12(3):e1001779. doi:10.1371/journal.pmed.1001779
14. Fry A, Littlejohns TJ, Sudlow C, et al. Comparison of Sociodemographic and Health-Related Characteristics of UK Biobank Participants With Those of the General Population. *Am J Epidemiol.* 2017;186(9):1026-1034. doi:10.1093/aje/kwx246
15. Sadhra SS, Kurmi OP, Chambers H, Lam KBH, Fishwick D, Group TOCR. Development of an occupational airborne chemical exposure matrix. *Occup Med-c.* 2016;66(5):358-364. doi:10.1093/occmed/kqw027
16. Vienneau D, Hoogh K de, Bechle MJ, et al. Western European Land Use Regression Incorporating Satellite- and Ground-Based Measurements of NO<sub>2</sub> and PM<sub>10</sub>. *Environ Sci Technol.* 2013;47(23):13555-13564. doi:10.1021/es403089q
17. (2019) RCT. R: A Language and Environment for Statistical Computing.; 2019. <https://www.R-project.org/>
18. Purcell S, Chang C. PLINK 2.0. [www.cog-genomics.org/plink/2.0/](http://www.cog-genomics.org/plink/2.0/)
19. Chang CC, Chow CC, Tellier LC, Vattikuti S, Purcell SM, Lee JJ. Second-generation PLINK: rising to the challenge of larger and richer datasets. *Gigascience.* 2015;4(1):7. doi:10.1186/s13742-015-0047-8



379 20. Danecek P, Bonfield JK, Liddle J, et al. Twelve years of SAMtools and BCFtools. *Gigascience*. 2021;10(2):giab008.  
380 doi:10.1093/gigascience/giab008

381 21. Li H. A statistical framework for SNP calling, mutation discovery, association mapping and population genetical parameter  
382 estimation from sequencing data. *Bioinformatics*. 2011;27(21):2987-2993. doi:10.1093/bioinformatics/btr509

383 22. Hanks JB, Mullan RN, O'Rourke DM, McNamee PT, Maxwell AP, Courtney AE. The changing pattern of adult primary  
384 glomerular disease. *Nephrology Dialysis Transplantation*. 2009;24(10):3050-3054. doi:10.1093/ndt/gfp254

385 23. Swaminathan S, Leung N, Lager DJ, et al. Changing incidence of glomerular disease in Olmsted County, Minnesota: a 30-  
386 year renal biopsy study. *Clin J Am Soc Nephrol*. 2006;1(3):483-487. doi:10.2215/cjn.00710805

387 24. Tang L, Yao J, Kong X, et al. Increasing prevalence of membranous nephropathy in patients with primary glomerular  
388 diseases: A cross-sectional study in China. *Nephrology*. 2017;22(2):168-173. doi:10.1111/nep.12739

389 25. Floege J, Amann K. Primary glomerulonephritides. *The Lancet*. 2016;0(0). doi:10.1016/s0140-6736(16)00272-5

390 26. Kanigicherla D, Gummadoova J, McKenzie EA, et al. Anti-PLA2R antibodies measured by ELISA predict long-term outcome  
391 in a prevalent population of patients with idiopathic membranous nephropathy. *Kidney Int*. 2013;83(5):940-948.  
392 doi:10.1038/ki.2012.486

393 27. Jacobson DL, Gange SJ, Rose NR, Graham NMH. Epidemiology and Estimated Population Burden of Selected Autoimmune  
394 Diseases in the United States. *Clin Immunol Immunop*. 1997;84(3):223-243. doi:10.1006/clin.1997.4412

395 28. Burbelo PD, Joshi M, Chaturvedi A, et al. Detection of PLA2R Autoantibodies before the Diagnosis of Membranous  
396 Nephropathy. *J Am Soc Nephrol*. 2019;31(1):208-217. doi:10.1681/asn.2019050538

397 29. Noble JA, Valdes AM. Genetics of the HLA region in the prediction of type 1 diabetes. *Curr Diab Rep*. 2011 Dec;11(6):533-  
398 42. doi: 10.1007/s11892-011-0223-x. PMID: 21912932; PMCID: PMC3233362.

399 30. Sollid, L. M. et al. Evidence for a primary association of celiac disease to a particular HLA-DQ alpha/beta heterodimer. *J*  
400 *Exp Medicine* 169, 345–350 (1989).

401 31. Lundin, K. E. et al. Gliadin-specific, HLA-DQ(alpha 1\*0501,beta 1\*0201) restricted T cells isolated from the small intestinal  
402 mucosa of celiac disease patients. *J Exp Medicine* 178, 187–196 (1993).

403

404 Supplementary Material Table of Contents (PDF)

405

406 Table S1 Biobank fields and variable definitions

407 Table S2 Allele counts at the lead SNPs from GWAS1<sup>4</sup>, GWAS2<sup>5</sup>, and GWAS3<sup>6</sup> in all UK Biobank  
408 participants using the imputed UK Biobank datasets

409 Table S3 Counts of genotype combinations at the lead SNPs from GWAS1<sup>4</sup> and GWAS2<sup>5</sup> in all UK  
410 Biobank participants using both the imputed UK Biobank datasets

411 Table S4 Phenotype per combined genotype group at HLADQA1 (rs2187668, test allele T) and PLA2R1  
412 (rs4664308, test allele A) from GWAS1<sup>4</sup> in all UK Biobank participants using the directly  
413 genotyped UK Biobank dataset

414 Table S5 Phenotype and genotype by degree of proteinuria for all UK Biobank participants, with  
415 genotypes obtained from the imputed UK Biobank dataset at the lead SNPs from GWAS1<sup>4</sup>  
416 and GWAS2<sup>5</sup>.

417 Table S6 Environmental exposures – work-related

418

419 Figure S7 A) Time difference from GP diagnosis to HES diagnosis where the case was identified in both  
420 sources.

421 B) Age distributions of the cases identified in the two sources

422 C) Date of diagnosis of the cases identified in the two sources

423

Figure Legends

**Figure 1:** Monthly cumulative incidence of MN. A) Cases identified each calendar month B) Kaplan-Meier estimate by age with 95%CI.

**Figure 2:** Genetic Risk of MN by PLA2R1 and HLADQ. Based on directly called SNPs determined in GWAS1<sup>4</sup>

| ICD10 | Description                                                                    | Cases Detected |                | Prevalence per million |                | Incident Cases | Incidence Rate<br>(per 100,000 person-years) |
|-------|--------------------------------------------------------------------------------|----------------|----------------|------------------------|----------------|----------------|----------------------------------------------|
|       |                                                                                | Baseline       | Last follow up | Baseline               | Last follow up |                |                                              |
| N022  | Recurrent and persistent haematuria with diffuse membranous glomerulonephritis | 5              | 35             | 10                     | 70             | 30             | 0.60                                         |
| N032  | Chronic nephritic syndrome with diffuse membranous glomerulonephritis          | 4              | 12             | 8                      | 24             | 8              | 0.16                                         |
| N042  | Nephrotic syndrome with diffuse membranous glomerulonephritis                  | 4              | 27             | 8                      | 54             | 23             | 0.46                                         |
| N052  | Unspecified nephritic syndrome with diffuse membranous glomerulonephritis      | 25             | 56             | 50                     | 111            | 31             | 0.62                                         |
| Total | Putative Membranous Nephropathy                                                | 36             | 100            | 72                     | 199            | 64             | 1.29                                         |

Table 1 – incidence and prevalence

| Characteristics                                  |                            | No MN                 | MN               |
|--------------------------------------------------|----------------------------|-----------------------|------------------|
| <i>N</i>                                         |                            | 502407                | 100              |
| Age at baseline assessment                       | Median [IQR]               | 58 [50-63]            | 62 [56-65]       |
| Age at last follow-up (death or end of HES data) | Median [IQR]               | 68 [60-73]            | 70 (65-74)       |
| Sex                                              | Male                       | 273345/502407 (54.4%) | 39/100 (39%)     |
|                                                  | Female                     | 229062/502407 (45.6%) | 61/100 (61%)     |
| Ethnicity                                        | White                      | 472608/501509 (94.2%) | 90/100 (90%)     |
|                                                  | Asian                      | 9877/501509 (2.0%)    | 5/100 (5%)       |
|                                                  | Black                      | 8059/501509 (1.6%)    | 2/100 (2%)       |
|                                                  | Mixed/Other                | 9087/501509 (1.8%)    | 3/100 (3%)       |
|                                                  | Not Known                  | 1878/501509 (0.4%)    | 0/100 (0%)       |
| BMI                                              | Median [IQR]               | 26.7 [24.1-29.9]      | 27.5 [24.5-30.7] |
|                                                  | NA                         | 3104                  | 1                |
| Smoking Status                                   | Prefer not to answer       | 2057/501516 (0.4%)    | 0/100 (0%)       |
|                                                  | Never                      | 273472/501516 (54.5%) | 50/100 (50%)     |
|                                                  | Previous                   | 173018/501516 (34.5%) | 40/100 (40%)     |
|                                                  | Current                    | 52969/501516 (10.6%)  | 10/100 (10%)     |
| Alcohol Consumption                              | Prefer not to answer       | 756/501510 (0.2%)     | 0/100 (0%)       |
|                                                  | Never                      | 22377/501510 (4.5%)   | 8/100 (8%)       |
|                                                  | Previous                   | 18102/501510 (3.6%)   | 2/100 (2%)       |
|                                                  | Current                    | 460275/501510 (91.8%) | 90/100 (90%)     |
| Alcohol Consumption Frequency                    | Prefer not to answer       | 604/501510 (0.1%)     | 0/100 (0%)       |
|                                                  | Daily or almost daily      | 101751/501510 (20.3%) | 18/100 (18%)     |
|                                                  | Three or four times a week | 115422/501510 (23.0%) | 18/100 (18%)     |
|                                                  | Once or twice a week       | 129265/501510 (25.8%) | 27/100 (27%)     |
|                                                  | One to three times a month | 55848/501510 (11.1%)  | 7/100 (7%)       |
|                                                  | Special occasions          | 57989/501510 (11.6%)  | 20/100 (20%)     |
|                                                  | Never                      | 40631/501510 (8.1%)   | 10/100 (10%)     |
| Townsend Deprivation Index                       | Median [IQR]               | -2.1 [-3.6-0.6]       | -1.9 [-3.9-0.5]  |
|                                                  | NA                         | 623                   | 0                |
| Index of Multiple Deprivation                    | Median [IQR]               | 12.8 [7.1-23.3]       | 16.5 [8.4-27.6]  |
|                                                  | NA                         | 12737                 | 0                |

Table 2 – Demographics for the UK Biobank population

|                                  |              | No MN                 | MN               |                  |                  |                  |
|----------------------------------|--------------|-----------------------|------------------|------------------|------------------|------------------|
|                                  |              |                       | Any              | Baseline         | Early Incident   | Late Incident    |
|                                  |              | 502,407               | 100              | 36               | 36               | 28               |
| Self-reported Renal Failure      |              | 872/502407 (0.2%)     | 12/100 (12%)     | 8/36 (22%)       | 4/36 (11%)       | 0/28 (0%)        |
| HES CKD                          |              | 9033/502407 (1.8%)    | 49/100 (49%)     | 16/36 (44.%)     | 20/36 (56%)      | 13/28 (46%)      |
| HES Renal Disease                |              | 21931/502407 (4.4%)   | 100/100 (100%)   | 36/36 (100%)     | 36/36 (100%)     | 28/28 (100%)     |
| Algorithmically derived ESRD     |              | 1168/502407 (0.2%)    | 23/100 (23%)     | 8/36 (22%)       | 11/36 (31%)      | 4/28 (14%)       |
| uACR at baseline<br>(mg/g)       | <3           | 458536/484201 (94.7%) | 47/93 (50.5%)    | 11/32 (34%)      | 18/35 (51%)      | 18/26 (69%)      |
|                                  | 3-30         | 23405/484201 (4.8%)   | 23/93 (25%)      | 12/32 (38%)      | 7/35 (20%)       | 4/26 (15%)       |
|                                  | 30-250       | 2128/484201 (0.4%)    | 15/93 (16%)      | 7/32 (22%)       | 4/35 (11%)       | 4/26 (15%)       |
|                                  | >250         | 132/484201 (0.03%)    | 8/93 (8.6%)      | 2/32 (6%)        | 6/35 (17%)       | 0/26 (0%)        |
|                                  | Median (IQR) | 0.4 (0.4-0.6)         | 3.0 (0.4-22.9)   | 7.2 (2.6-31.2)   | 1.9 (0.4-99.2)   | 0.6 (0.4-8.8)    |
|                                  | Unknown      | 18206                 | 7                | 4                | 1                | 2                |
| eGFR at baseline (ml/min/1.73m²) | ≥90          | 277341/468781 (59.2%) | 32/89 (36%)      | 6/31 (19.4%)     | 11/33 (33%)      | 15/25 (60.0%)    |
|                                  | 60-90        | 180729/468781 (38.6%) | 31/89 (35%)      | 13/31 (42%)      | 10/33 (30%)      | 8/25 (32%)       |
|                                  | 15-60        | 10571/468781 (2.3%)   | 24/89 (27%)      | 11/31 (36%)      | 11/33 (33%)      | 2/25 (8%)        |
|                                  | <15          | 140/468781 (0.03%)    | 2/89 (2%)        | 1/31 (3%)        | 1/33 (3.0%)      | 0/25 (0%)        |
|                                  | Median (IQR) | 92.8 (82.9-100.1)     | 78.1 (52.2-93.6) | 74.3 (46.8-86.7) | 76.8 (48.8-93.8) | 92.9 (76.3-95.0) |
|                                  | Unknown      | 33626                 | 11               | 5                | 3                | 3                |
| Self-reported Diabetes           |              | 25468/502407 (5.1%)   | 12/100 (12%)     | 5/36 (14%)       | 5/36 (14%)       | 2/28 (7.%)       |
| HES Diabetes                     |              | 31266/502407 (6.2%)   | 17/100 (17%)     | 8/36 (22%)       | 6/36 (17%)       | 3/28 (11%)       |
| Self-reported Coeliac Disease    |              | 2049/502407 (0.4%)    | 0/100 (0%)       | 0/36 (0.)        | 0/36 (0%)        | 0/28 (0%)        |
| HES Coeliac Disease              |              | 2481/502407 (0.5%)    | 1/100 (1%)       | 1/36 (3%)        | 0/36 (0%)        | 0/28 (0%)        |
| Self-reported Renal Biopsy       |              | 129/502407 (0.03%)    | 3/100 (3%)       | 3/36 (8%)        | 0/36 (0%)        | 0/28 (0%)        |
| OPCS Renal Biopsy                |              | 288/413517 (0.07%)    | 6/100 (6%)       | 3/36 (8%)        | 2/36 (6%)        | 1/28 (4%)        |

Table 3 – Phenotype per group. Relationship between baseline cases, all incident cases, and incident cases ≤5 years from baseline. MN = Membranous Nephropathy, HES = Hospital Episode Statistics, CKD = Chronic Kidney Disease, ESRD = End-Stage Renal Disease, ACR = urinary albumin:creatinine ratio, eGFR = estimated Glomerular Filtration Rate, IQR = Inter-Quartile Range, SD = Standard Deviation, OPCS = OPCS Classification of Interventions and Procedures. See supplementary material table 1 for biobank variable codes and sources. eGFR calculated at baseline, algorithmically derived ESRD assessed throughout follow up period.

|                                        |                           |                  | MN                | RR (95% CI)        | GWAS OR          |
|----------------------------------------|---------------------------|------------------|-------------------|--------------------|------------------|
| GWAS1 <sup>4</sup>                     | HLADQA1<br>rs2187668      | CC               | 44/357516 (0.01%) | 1                  |                  |
|                                        |                           | CT               | 39/118070 (0.03%) | 2.68 (1.74-4.13)   |                  |
|                                        |                           | TT               | 14/11622 (0.12%)  | 9.79 (5.36-17.85)  |                  |
|                                        |                           | OR Per allele    |                   | 3.11 (2.31-4.18)   | 4.32 (3.73-5.01) |
|                                        | PLA2R1<br>rs4664308       | GG               | 11/81861 (0.01%)  | 1                  |                  |
|                                        |                           | AG               | 34/230759 (0.02%) | 1.10 (0.56-2.16)   |                  |
|                                        |                           | AA               | 52/174588 (0.03%) | 2.22 (1.16-4.25)   |                  |
|                                        |                           | OR Per allele    |                   | 1.66 (1.22-2.26)   | 2.28 (1.9--2.64) |
| GWAS2 <sup>5</sup>                     | HLADQA1<br>rs9272729      | GG               | 44/351417 (0.01%) | 1                  |                  |
|                                        |                           | AG               | 41/117731 (0.04%) | 2.78 (1.82-4.26)   |                  |
|                                        |                           | AA               | 12/10747 (0.11%)  | 8.92 (4.71-16.88)  |                  |
|                                        |                           | OR Per allele    |                   | 2.99 (2.17-4.11)   | 6.86 (4.55-10.3) |
|                                        | PLA2R1<br>rs17830558      | GG               | 22/138318 (0.02%) | 1                  |                  |
|                                        |                           | TG               | 40/228842 (0.02%) | 1.10 (0.65-1.85)   |                  |
|                                        |                           | TT               | 33/105620 (0.03%) | 1.96 (1.15-3.37)   |                  |
|                                        |                           | OR Per allele    |                   | 1.44 (1.08-1.90)   | 1.63 (1.23-2.15) |
| GWAS3 <sup>6</sup>                     | HLADRB1/DQA1<br>rs9271573 | CC               | 24/170192 (0.01%) | 1                  |                  |
|                                        |                           | AC               | 41/234411 (0.02%) | 1.24 (0.75-2.05)   |                  |
|                                        |                           | AA               | 32/82375 (0.04%)  | 2.75 (1.62-4.68)   |                  |
|                                        |                           | OR per allele    |                   | 1.70 (1.28-2.25)   | 2.41 (2.26-2.57) |
|                                        | PLA2R1<br>rs17831251      | TT               | 11/80771 (0.014%) | 1                  |                  |
|                                        |                           | CT               | 33/227843 (0.01%) | 1.06 (0.54-2.10)   |                  |
|                                        |                           | CC               | 51/172495 (0.03%) | 2.17 (1.13-4.16)   |                  |
|                                        |                           | OR per allele    |                   | 1.67 (1.22-2.28)   | 2.25 (2.09-2.42) |
|                                        | NFKB1<br>rs230540         | CC               | 11/59492 (0.02%)  | 1                  |                  |
|                                        |                           | CT               | 43/216576 (0.02%) | 1.07 (0.55-2.08)   |                  |
|                                        |                           | TT               | 41/205265 (0.02%) | 1.08 (0.56-2.10)   |                  |
|                                        |                           | OR per allele    |                   | 0.97 (0.72-1.31)   | 1.25 (1.17-1.33) |
|                                        | IRF4<br>rs9405192         | AA               | 4/33043 (0.01%)   | 1                  |                  |
|                                        |                           | GA               | 39/182247 (0.02%) | 1.77 (0.63-4.95)   |                  |
|                                        |                           | GG               | 54/259096 (0.02%) | 1.72 (0.62-4.75)   |                  |
|                                        |                           | OR per allele    |                   | 0.90 (0.65-1.25)   | 1.29 (1.21-1.37) |
| GWAS1 <sup>4</sup><br>SNP Combinations | HLADQA1<br>rs2187668      | CCGG             | 5/59756 (0.01%)   | 1                  |                  |
|                                        |                           | CCAG             | 17/168473 (0.01%) | 1.21 (0.44-3.27)   |                  |
|                                        |                           | CCAA             | 22/129287 (0.02%) | 2.03 (0.77-5.37)   |                  |
|                                        |                           | CTGG             | 4/20131 (0.02%)   | 2.37 (0.64-8.84)   |                  |
|                                        | PLA2R1<br>rs4664308       | CTAG             | 13/56717 (0.02%)  | 2.74 (0.98-7.68)   |                  |
|                                        |                           | CTAA             | 22/41222 (0.05%)  | 6.38 (2.42-16.84)  |                  |
|                                        |                           | TTAG             | 4/5569 (0.07%)    | 8.58 (2.31-31.96)  |                  |
|                                        |                           | TTGG             | 2/1974 (0.10%)    | 12.11 (2.35-62.37) |                  |
|                                        |                           | TTAA             | 8/4079 (0.20%)    | 23.44 (7.67-71.62) |                  |
|                                        |                           |                  |                   |                    |                  |
| GWAS1 <sup>4</sup><br>Risk Groups      | Low Risk                  | CCGG             | 5/59756 (0.01%)   | 1                  |                  |
|                                        | Medium Risk               | All else         | 84/423373 (0.02%) | 2.37 (0.96-5.85)   |                  |
|                                        | High Risk                 | TTAA             | 8/4079 (0.20%)    | 23.44 (7.67-71.62) |                  |
| GWAS1 <sup>4</sup><br>PLA2R1 Groups    | No PLA2R1<br>allele       | CCGG, CTGG, TTGG | 11/81861 (0.01%)  | 1                  |                  |
|                                        | PLA2R1 Allele             | All Else         | 86/405347 (0.02%) | 1.58 (0.84-2.96)   |                  |

Table 4 – Genetic risk analysis in the membranous nephropathy cohort using the lead SNPs from GWAS1<sup>4</sup>, GWAS2<sup>5</sup> and GWAS3<sup>6</sup> from the imputed UK Biobank dataset. *MN* - Membranous Nephropathy, *RR* - Relative Risk, *CI* - Confidence Interval, *GWAS* - Genome-wide Association Study, *OR* - Odds Ratio, *SNP* - Single Nucleotide Polymorphism

| Genotype Groups                              |                                     | MN Prevalence |                | Incident Cases | Total Follow-up<br>(in 100,000 years) | Incidence Rate<br>(per 100,000 years) |
|----------------------------------------------|-------------------------------------|---------------|----------------|----------------|---------------------------------------|---------------------------------------|
|                                              |                                     | Baseline      | Last follow up |                |                                       |                                       |
| GWAS1 HLADQA1 and<br>PLA2R1 SNP Combinations | CCGG                                | 2             | 5              | 3              | 5.92                                  | 0.5                                   |
|                                              | CTGG                                | 1             | 4              | 3              | 2.00                                  | 1.5                                   |
|                                              | TTGG                                | 0             | 2              | 2              | 2.00                                  | 10.2                                  |
|                                              | CCAG                                | 5             | 17             | 12             | 16.68                                 | 0.7                                   |
|                                              | CTAG                                | 5             | 13             | 8              | 5.62                                  | 1.4                                   |
|                                              | TTAG                                | 1             | 4              | 3              | 0.55                                  | 5.5                                   |
|                                              | CCAA                                | 4             | 22             | 18             | 12.77                                 | 1.4                                   |
|                                              | CTAA                                | 13            | 22             | 9              | 4.08                                  | 2.2                                   |
|                                              | TTAA                                | 4             | 8              | 4              | 0.40                                  | 9.9                                   |
|                                              | Unknown HLADQ or PLA2R1             | 1             | 3              | 2              | 1.60                                  | 1.3                                   |
| Risk Groups                                  | Low Risk (CCGG)                     | 2             | 5              | 3              | 5.92                                  | 0.5                                   |
|                                              | Medium Risk (All Else)              | 29            | 84             | 55             | 41.88                                 | 1.3                                   |
|                                              | High Risk (TTAA)                    | 4             | 8              | 4              | 0.40                                  | 9.9                                   |
| PLA2R1 Allele Groups                         | No PLA2R1 Allele (CCGG, CTGG, TTGG) | 3             | 11             | 8              | 8.11                                  | 1.0                                   |
|                                              | PLA2R1 Allele (All Else)            | 32            | 86             | 54             | 40.10                                 | 1.3                                   |

Table 5 - Prevalence and incidence measures for: those in high-risk and low-risk groups; those with a PLA2R1 allele and without a PLA2R1 allele



| Pollution Metric                       |        | No MN               | MN                  | RR (95% CI)      |
|----------------------------------------|--------|---------------------|---------------------|------------------|
|                                        |        | Median [IQR]        | Median [IQR]        |                  |
| Nitrogen Dioxide                       | 2005   | 28.4 [23.1-34.7]    | 28.9 [24.2-36.6]    | 1.01 (0.99-1.03) |
|                                        | 2006   | 27.9 [22.8-33.3]    | 28.4 [23.7-35.2]    | 1.01 (0.99-1.03) |
|                                        | 2007   | 28.9 [23.6-35.0]    | 30.3 [24.5-36.7]    | 1.01 (0.99-1.03) |
|                                        | 2010   | 26.2 [21.5-31.3]    | 26.4 [21.8-30.9]    | 1.01 (0.98-1.03) |
| Nitrogen Oxides                        | 2010   | 42.4 [34.4-50.8]    | 42.9 [34.6-51.2]    | 1.00 (0.99-1.01) |
| Particulate Matter                     | <2.5um | 9.9 [9.3-10.6]      | 10.0 [9.5-10.5]     | 1.02 (0.84-1.23) |
|                                        | <10um  | 16.0 [15.2-17.0]    | 16.1 [15.4-16.8]    | 0.98 (0.88-1.09) |
| Distance to main road (per 100 metres) |        | 377.4 [166.9-751.9] | 378.8 [228.6-711.8] | 0.98 [0.95-1.02] |

Table 6 - Associations with environmental exposures presented in  $\mu\text{g}/\text{m}^3$ : pollution exposure: Identified MN cases versus controls with no diagnosed MN

A

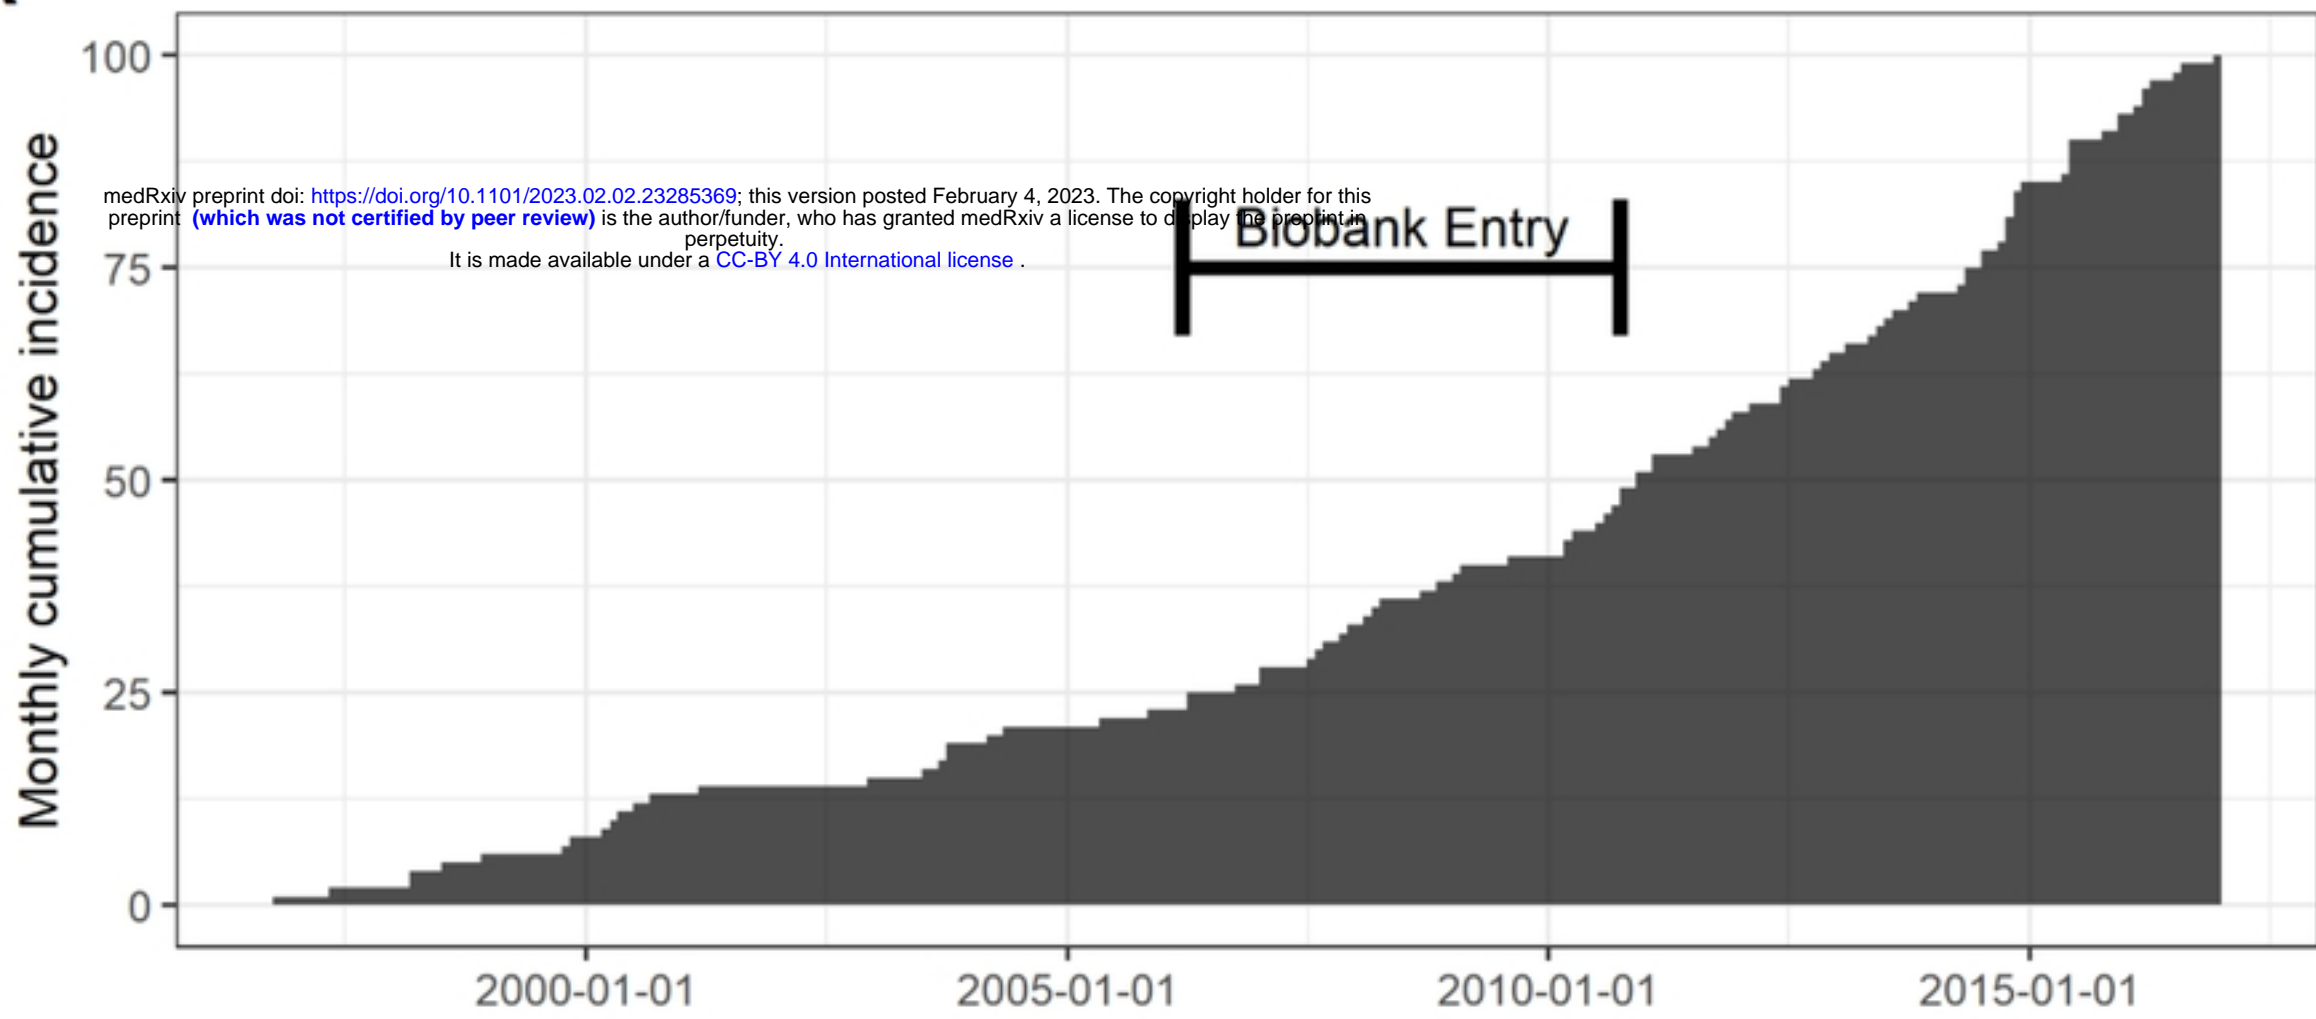

B

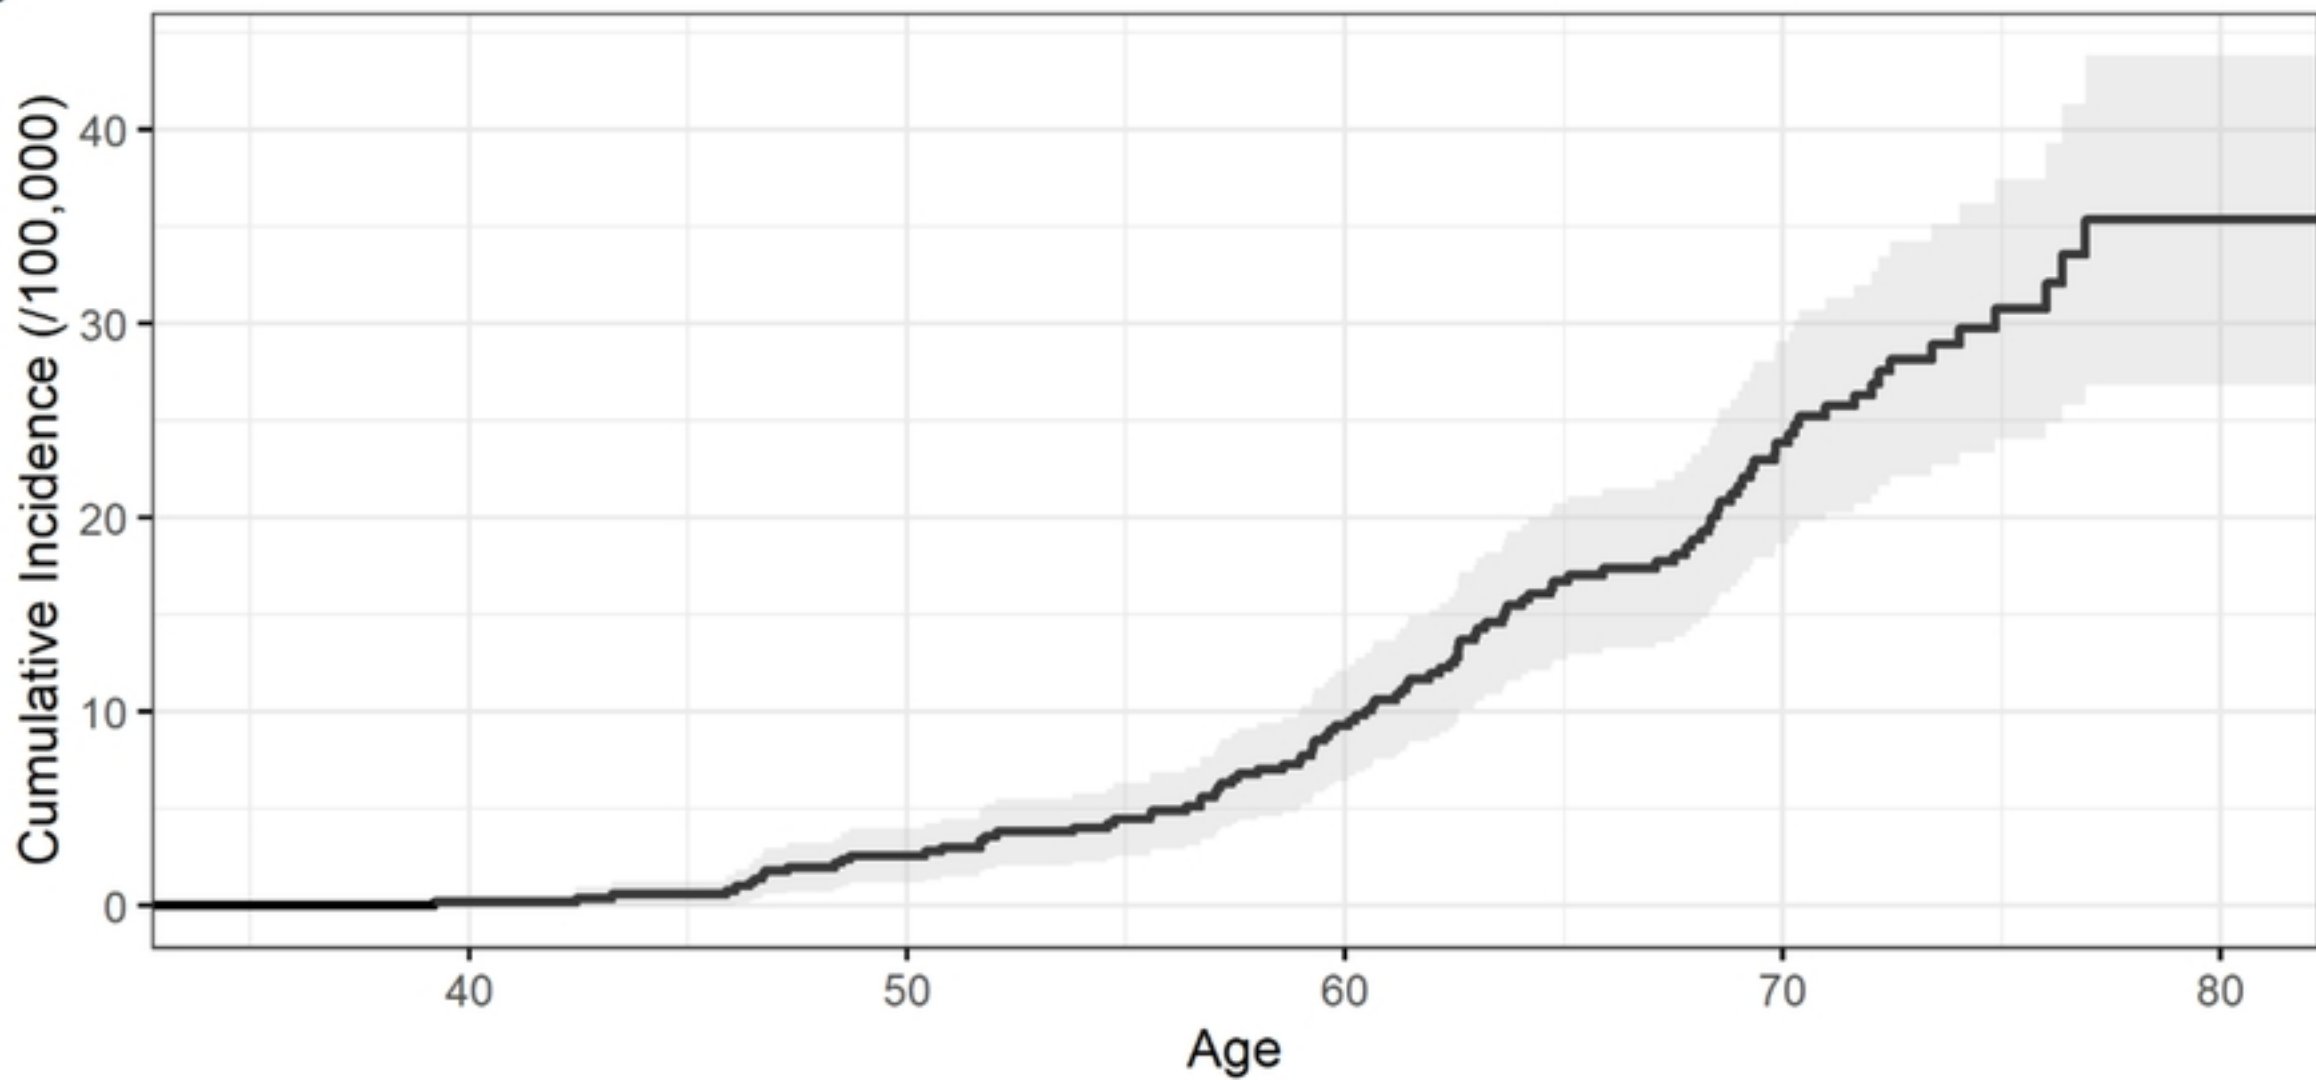

Figure 1

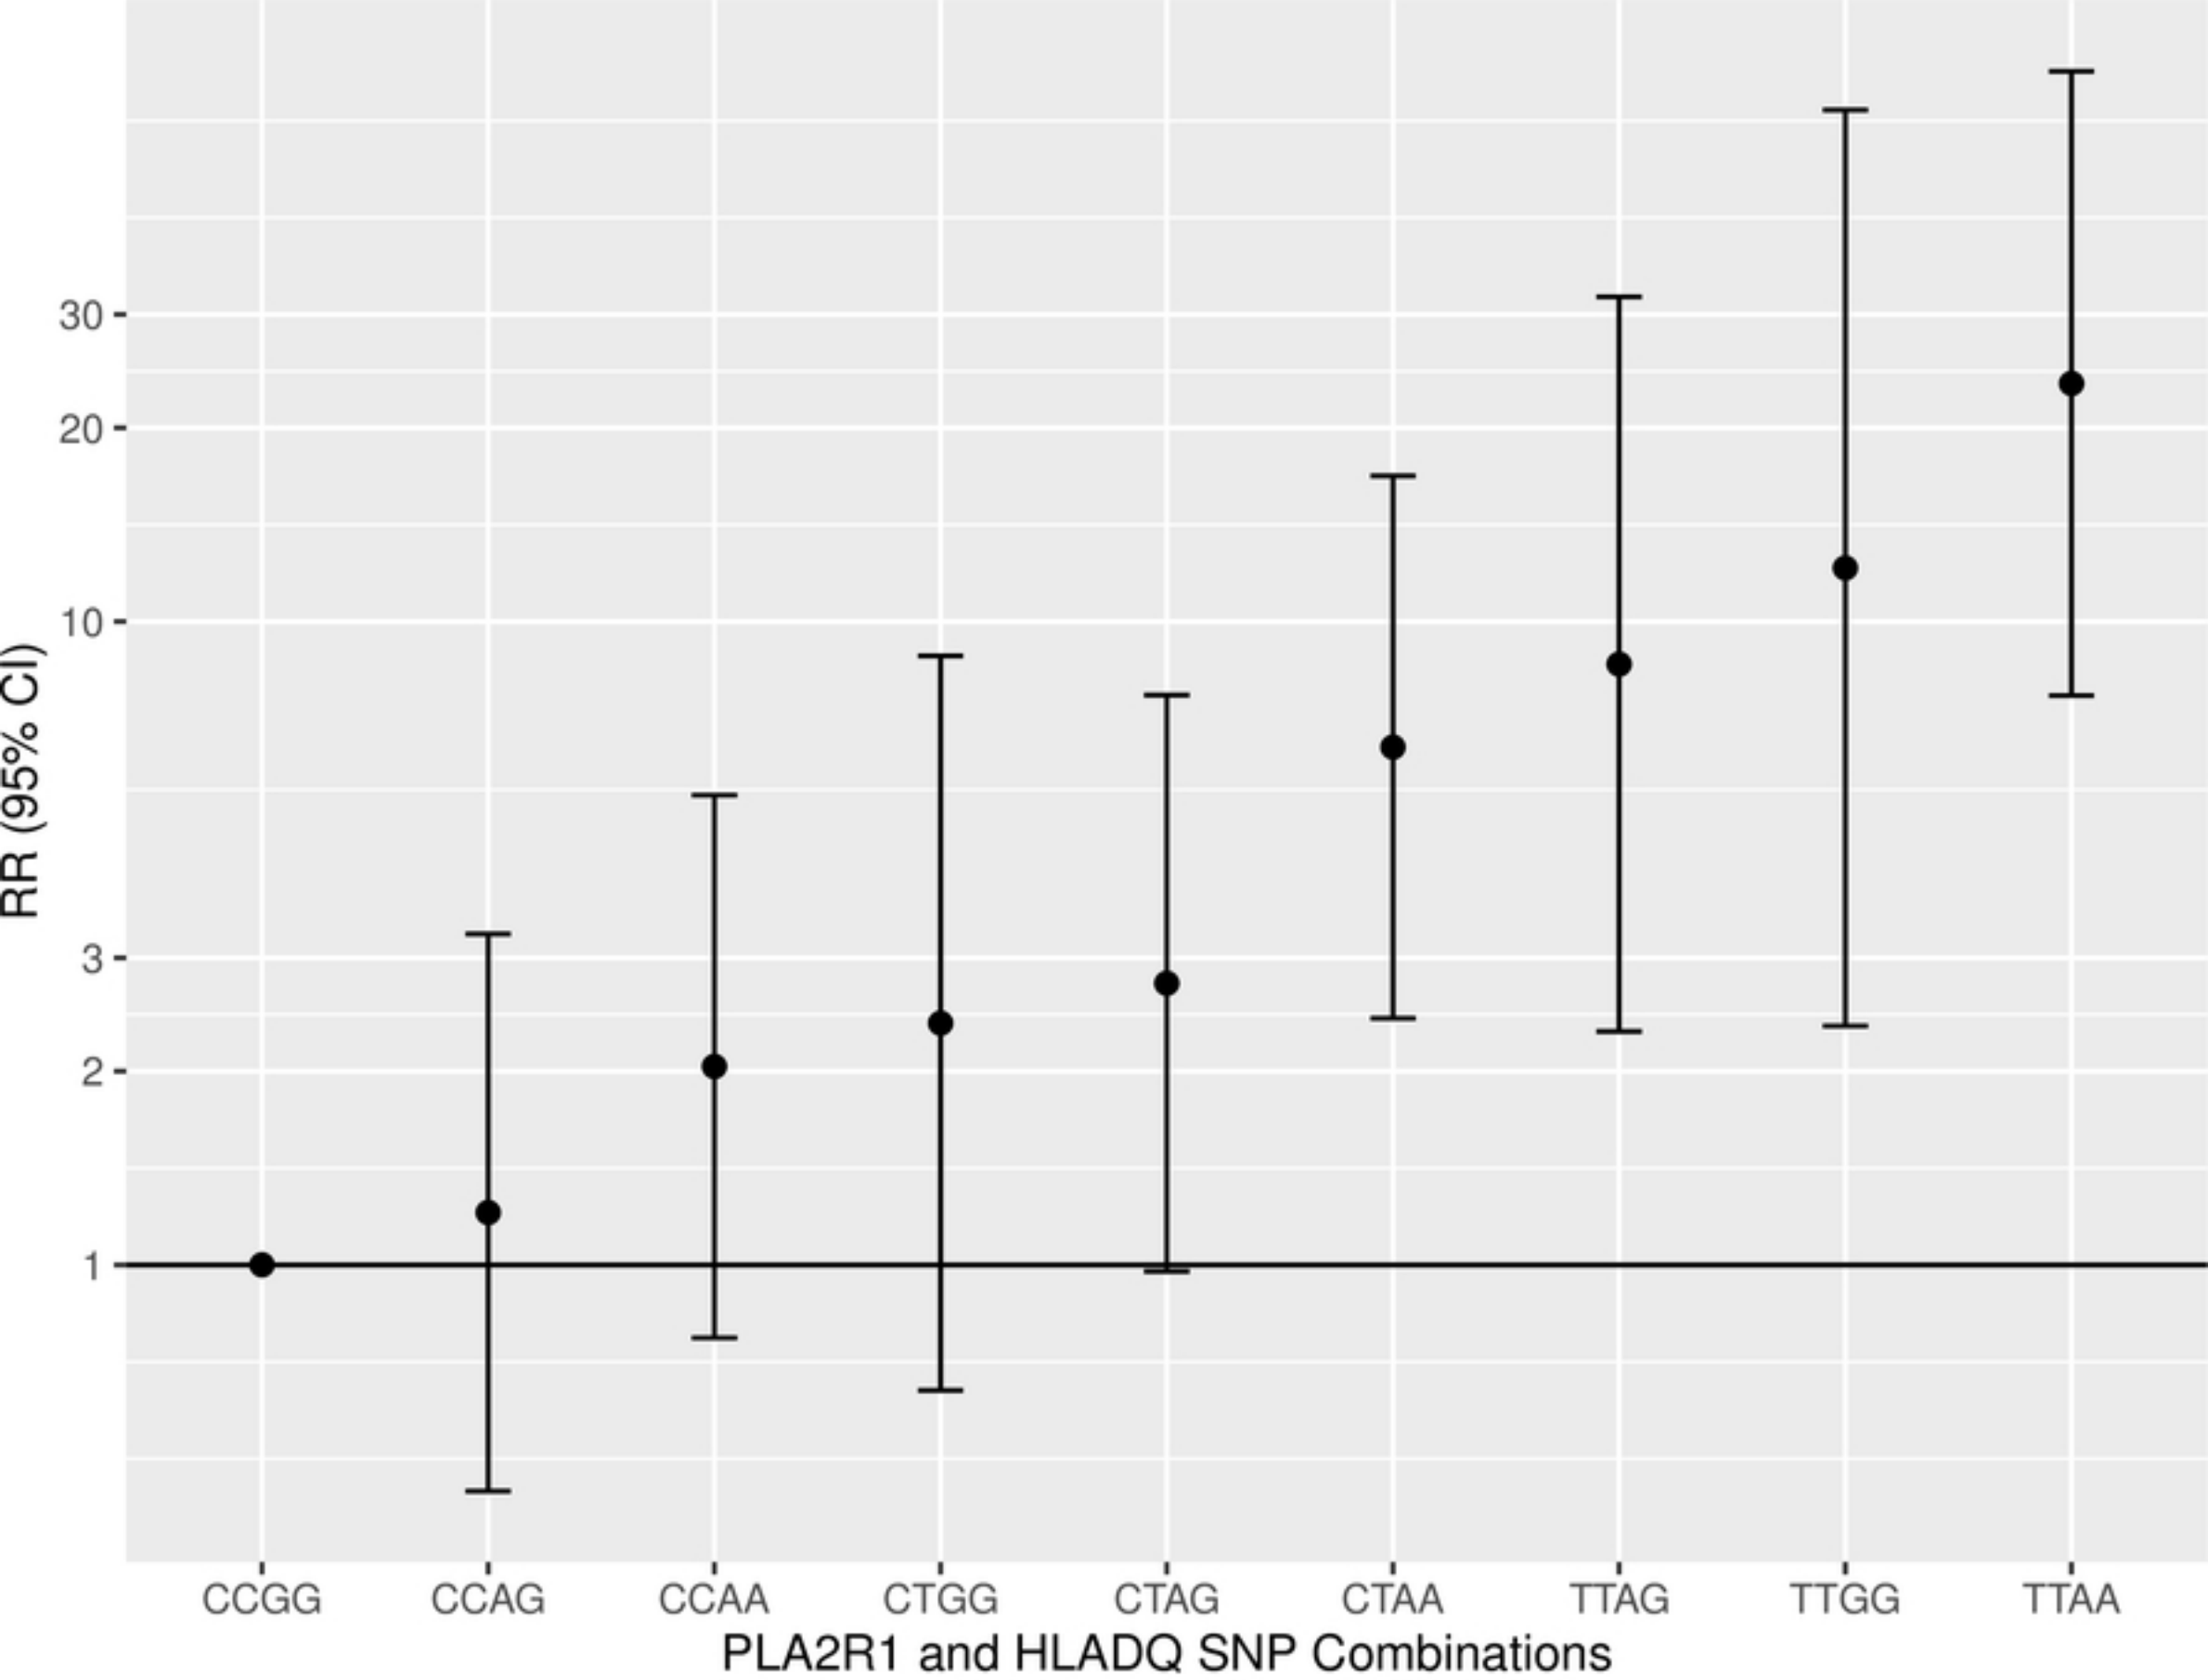

Figure 2
